# Supplementary material for: Oxalamide Based Fe(II)-MOFs as Potential Electrode Modifiers for Glucose Detection
Source: MDPI journal article supplement (doi:10.3390/chemistry5010002), 2022-12-20

---

The following ALERTS were generated. Each ALERT has the format

**test-name\_ALERT\_alert-type\_alert-level.**

Click on the hyperlinks for more details of the test.

---

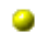

### Alert level C

THETM01\_ALERT\_3\_C The value of  $\sin(\theta_{\max})/\lambda$  is less than 0.590  
Calculated  $\sin(\theta_{\max})/\lambda = 0.5878$

|                   |                                           |                             |         |        |
|-------------------|-------------------------------------------|-----------------------------|---------|--------|
| PLAT029_ALERT_3_C | _diffrn_measured_fraction_theta_full      | value Low                   | 0.968   | Why?   |
| PLAT088_ALERT_3_C | Poor Data / Parameter Ratio               | .....                       | 9.60    | Note   |
| PLAT148_ALERT_3_C | s.u. on the                               | a - Axis is (Too) Large     | 0.011   | Ang.   |
| PLAT148_ALERT_3_C | s.u. on the                               | c - Axis is (Too) Large     | 0.013   | Ang.   |
| PLAT250_ALERT_2_C | Large U3/U1 Ratio for Average U(i,j)      | Tensor                      | 2.3     | Note   |
| PLAT341_ALERT_3_C | Low Bond Precision on                     | C-C Bonds                   | 0.00853 | Ang.   |
| PLAT369_ALERT_2_C | Long                                      | C(sp2)-C(sp2) Bond C9 - C10 | 1.54    | Ang.   |
| PLAT906_ALERT_3_C | Large K Value in the Analysis of Variance | .....                       | 3.128   | Check  |
| PLAT911_ALERT_3_C | Missing FCF Refl Between Thmin & STh/L=   | 0.588                       | 112     | Report |
| PLAT975_ALERT_2_C | Check Calcd Resid. Dens.                  | 0.97Ang From O13            | 0.47    | eA-3   |
| PLAT975_ALERT_2_C | Check Calcd Resid. Dens.                  | 1.02Ang From O11            | 0.44    | eA-3   |
| PLAT976_ALERT_2_C | Check Calcd Resid. Dens.                  | 1.04Ang From O14            | -0.46   | eA-3   |
| PLAT976_ALERT_2_C | Check Calcd Resid. Dens.                  | 0.95Ang From O10            | -0.46   | eA-3   |
| PLAT977_ALERT_2_C | Check Negative Difference Density on      | H1                          | -0.36   | eA-3   |
| PLAT977_ALERT_2_C | Check Negative Difference Density on      | H15A                        | -0.31   | eA-3   |

---

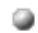

### Alert level G

|                   |                                                  |       |        |
|-------------------|--------------------------------------------------|-------|--------|
| PLAT002_ALERT_2_G | Number of Distance or Angle Restraints on AtSite | 5     | Note   |
| PLAT004_ALERT_5_G | Polymeric Structure Found with Maximum Dimension | 3     | Info   |
| PLAT007_ALERT_5_G | Number of Unrefined Donor-H Atoms                | 12    | Report |
| PLAT072_ALERT_2_G | SHELXL First Parameter in WGHT Unusually Large   | 0.13  | Report |
| PLAT164_ALERT_4_G | Nr. of Refined C-H H-Atoms in Heavy-Atom Struct. | 3     | Note   |
| PLAT176_ALERT_4_G | The CIF-Embedded .res File Contains SADI Records | 2     | Report |
| PLAT199_ALERT_1_G | Reported _cell_measurement_temperature           | 293   | Check  |
| PLAT200_ALERT_1_G | Reported _diffrn_ambient_temperature             | 293   | Check  |
| PLAT794_ALERT_5_G | Tentative Bond Valency for Fe1                   | 2.06  | Info   |
| PLAT794_ALERT_5_G | Tentative Bond Valency for Fe2                   | 2.07  | Info   |
| PLAT860_ALERT_3_G | Number of Least-Squares Restraints               | 2     | Note   |
| PLAT909_ALERT_3_G | Percentage of I>2sig(I) Data at Theta(Max) Still | 57%   | Note   |
| PLAT941_ALERT_3_G | Average HKL Measurement Multiplicity             | 2.3   | Low    |
| PLAT967_ALERT_5_G | Note: Two-Theta Cutoff Value in Embedded .res    | 130.0 | Degree |
| PLAT978_ALERT_2_G | Number C-C Bonds with Positive Residual Density. | 0     | Info   |

---

- 0 **ALERT level A** = Most likely a serious problem - resolve or explain  
0 **ALERT level B** = A potentially serious problem, consider carefully  
16 **ALERT level C** = Check. Ensure it is not caused by an omission or oversight  
15 **ALERT level G** = General information/check it is not something unexpected

- 2 ALERT type 1 CIF construction/syntax error, inconsistent or missing data  
11 ALERT type 2 Indicator that the structure model may be wrong or deficient  
11 ALERT type 3 Indicator that the structure quality may be low  
2 ALERT type 4 Improvement, methodology, query or suggestion  
5 ALERT type 5 Informative message, check
-

It is advisable to attempt to resolve as many as possible of the alerts in all categories. Often the minor alerts point to easily fixed oversights, errors and omissions in your CIF or refinement strategy, so attention to these fine details can be worthwhile. In order to resolve some of the more serious problems it may be necessary to carry out additional measurements or structure refinements. However, the purpose of your study may justify the reported deviations and the more serious of these should normally be commented upon in the discussion or experimental section of a paper or in the "special\_details" fields of the CIF. checkCIF was carefully designed to identify outliers and unusual parameters, but every test has its limitations and alerts that are not important in a particular case may appear. Conversely, the absence of alerts does not guarantee there are no aspects of the results needing attention. It is up to the individual to critically assess their own results and, if necessary, seek expert advice.

### **Publication of your CIF in IUCr journals**

A basic structural check has been run on your CIF. These basic checks will be run on all CIFs submitted for publication in IUCr journals (*Acta Crystallographica*, *Journal of Applied Crystallography*, *Journal of Synchrotron Radiation*); however, if you intend to submit to *Acta Crystallographica Section C* or *E* or *IUCrData*, you should make sure that full publication checks are run on the final version of your CIF prior to submission.

### **Publication of your CIF in other journals**

Please refer to the *Notes for Authors* of the relevant journal for any special instructions relating to CIF submission.

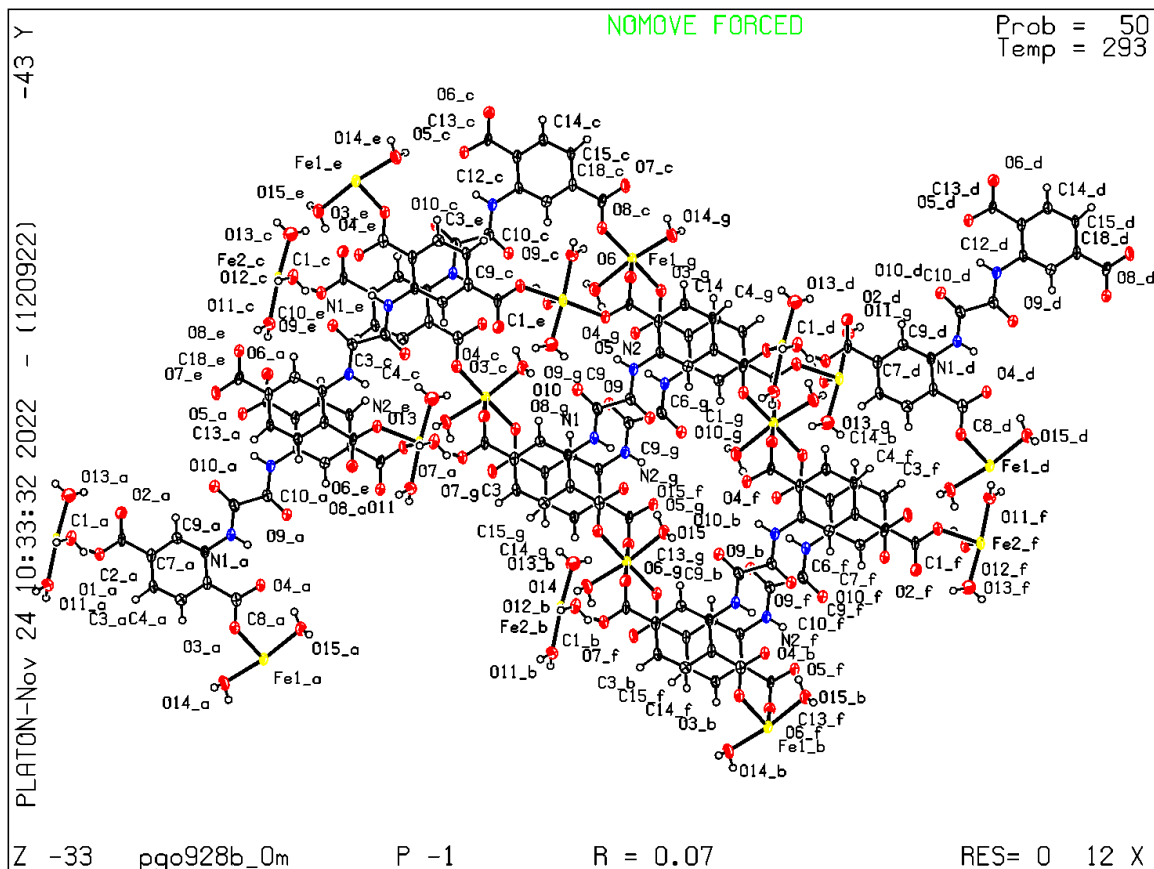

Supplement: s1 [file s1]
