# Supplementary material for: Oxalamide Based Fe(II)-MOFs as Potential Electrode Modifiers for Glucose Detection
Source: MDPI journal article supplement (doi:10.3390/chemistry5010002), 2022-12-20
Supplement: s1 [file s1]

# Supplementary materials

## Oxalamide based Fe(II)-MOFs as potential electrode modifiers for glucose detection

Panagiotis Oikonomopoulos <sup>1</sup>, Varvara Pagkali <sup>2</sup>, Evangelia Kritikou <sup>2</sup>, Anthi Panara <sup>2</sup>, Marios G. Kostakis <sup>2</sup>, Nicolaos S. Thomaidis <sup>2</sup>, Thomas G. Tziotzi <sup>3</sup>, Anastasios Economou <sup>2</sup>, Christos Kokkinos <sup>2</sup> and Giannis S. Papaefstathiou <sup>1,\*</sup>

<sup>1</sup> Laboratory of Inorganic Chemistry, Department of Chemistry, National and Kapodistrian University of Athens, 15771 Athens, Greece

<sup>2</sup> Laboratory of Analytical Chemistry, Department of Chemistry, National and Kapodistrian University of Athens, 15771 Athens, Greece

<sup>3</sup> Department of Chemistry, University of Crete, Voutes 710 03, Herakleion, Greece

\* Correspondence: gspapaef@chem.uoa.gr

**Table S1.** Crystal data and structure refinement for the two compounds.

| Identification code                         | 3D-Fe-MOF                                                                      | 2D-Fe-MOF                                                        |
|---------------------------------------------|--------------------------------------------------------------------------------|------------------------------------------------------------------|
| Empirical formula                           | C <sub>18</sub> H <sub>18</sub> Fe <sub>2</sub> N <sub>2</sub> O <sub>15</sub> | C <sub>18</sub> H <sub>18</sub> FeN <sub>2</sub> O <sub>14</sub> |
| Formula weight                              | 614.04                                                                         | 542.19                                                           |
| Temperature/K                               | 293(2)                                                                         | 219.99                                                           |
| Crystal system                              | triclinic                                                                      | monoclinic                                                       |
| Space group                                 | P-1                                                                            | P2 <sub>1</sub> /n                                               |
| a/Å                                         | 9.872(11)                                                                      | 10.7010(3)                                                       |
| b/Å                                         | 9.893(9)                                                                       | 4.49550(10)                                                      |
| c/Å                                         | 10.889(13)                                                                     | 21.6669(6)                                                       |
| α/°                                         | 77.72(4)                                                                       | 90                                                               |
| β/°                                         | 84.23(4)                                                                       | 94.7210(10)                                                      |
| γ/°                                         | 89.29(3)                                                                       | 90                                                               |
| Volume/Å <sup>3</sup>                       | 1033.8(19)                                                                     | 1038.78(5)                                                       |
| Z                                           | 2                                                                              | 2                                                                |
| ρ <sub>calc</sub> /g/cm <sup>3</sup>        | 1.973                                                                          | 1.733                                                            |
| μ/mm <sup>-1</sup>                          | 12.099                                                                         | 6.591                                                            |
| F(000)                                      | 624.0                                                                          | 556.0                                                            |
| Crystal size/mm <sup>3</sup>                | 0.165 × 0.015 × 0.015                                                          | 0.21 × 0.085 × 0.02                                              |
| Radiation                                   | CuKα (λ = 1.54178)                                                             | CuKα (λ = 1.54178)                                               |
| 2θ range for data collection/°              | 8.352 to 129.976                                                               | 8.188 to 136.79                                                  |
| Index ranges                                | -11 ≤ h ≤ 11, -11 ≤ k ≤ 11, -12 ≤ l ≤ 12                                       | -10 ≤ h ≤ 12, -5 ≤ k ≤ 5, -26 ≤ l ≤ 26                           |
| Reflections collected                       | 7679                                                                           | 9797                                                             |
| Independent reflections                     | 3409 [R <sub>int</sub> = 0.0653, R <sub>sigma</sub> = 0.0860]                  | 1899 [R <sub>int</sub> = 0.0439, R <sub>sigma</sub> = 0.0293]    |
| Data/restraints/parameters                  | 3409/2/355                                                                     | 1899/0/196                                                       |
| Goodness-of-fit on F <sup>2</sup>           | 1.071                                                                          | 1.061                                                            |
| Final R indexes [I ≥ 2σ (I)]                | R <sub>1</sub> = 0.0671, wR <sub>2</sub> = 0.1823                              | R <sub>1</sub> = 0.0312, wR <sub>2</sub> = 0.0876                |
| Final R indexes [all data]                  | R <sub>1</sub> = 0.0907, wR <sub>2</sub> = 0.2034                              | R <sub>1</sub> = 0.0318, wR <sub>2</sub> = 0.0886                |
| Largest diff. peak/hole / e Å <sup>-3</sup> | 1.14/-0.95                                                                     | 0.54/-0.31                                                       |

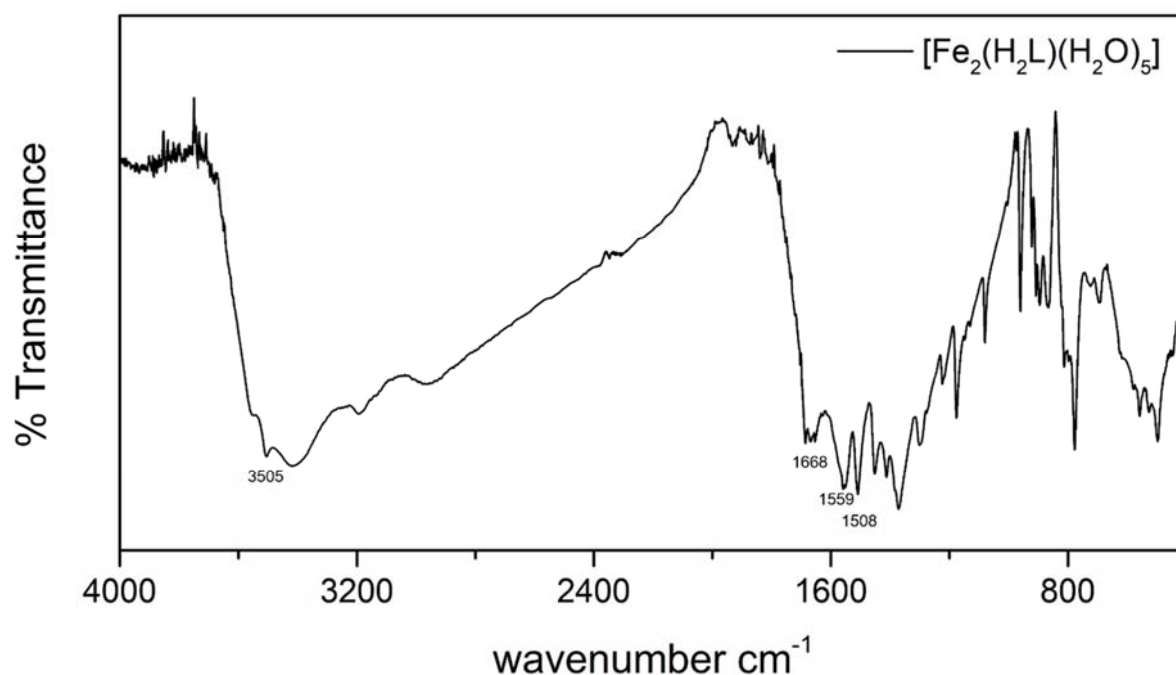

**Figure S1.** The IR spectra (KBr disc) of  $[\text{Fe}_2(\text{H}_2\text{L})(\text{H}_2\text{O})_5]$ . Free N-H vibration is observed at around 3505  $\text{cm}^{-1}$ . C-N stretching vibration is found at 1301  $\text{cm}^{-1}$ . The stretching vibrations  $\nu(\text{C}=\text{O})$  of the carbonyl group is observed at 1668  $\text{cm}^{-1}$ . The peaks 1559  $\text{cm}^{-1}$  and 1451  $\text{cm}^{-1}$  are attributed to the asymmetric vibrations of the deprotonated carboxylates while at 1508  $\text{cm}^{-1}$  and 1412  $\text{cm}^{-1}$  to the respective symmetric vibrations. The stretch of the C=O of the carboxylate which is anticipated at around 1710  $\text{cm}^{-1}$  is absent due to the tetra-deportation of the ligand.

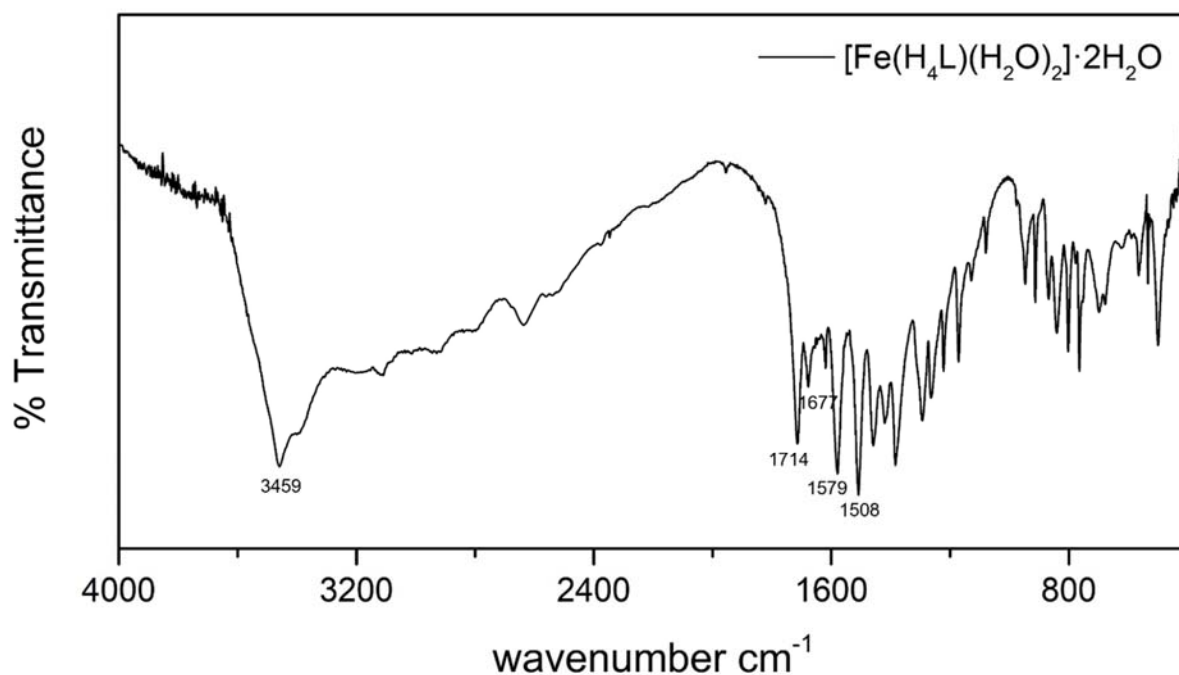

**Figure S2.** The IR spectra (KBr disc) of  $[\text{Fe}(\text{H}_4\text{L})(\text{H}_2\text{O})_2] \cdot 2\text{H}_2\text{O}$ . Free N-H absorption is observed at around 3459  $\text{cm}^{-1}$ . C-N stretching vibration is found at 1294  $\text{cm}^{-1}$ . The stretching vibrations  $\nu(\text{C}=\text{O})$  of the carbonyl group is observed at 1677  $\text{cm}^{-1}$ . The peaks 1579  $\text{cm}^{-1}$  and 1458  $\text{cm}^{-1}$  are attributed to the asymmetric vibrations of the deprotonated carboxylates while at 1508  $\text{cm}^{-1}$  and 1420  $\text{cm}^{-1}$  to the respective symmetric vibrations. Because of the deprotonation of the ligand ( $\text{H}_4\text{L}^{2-}$ ) the stretch of the C=O of the carboxylate can be observed at 1714  $\text{cm}^{-1}$ .

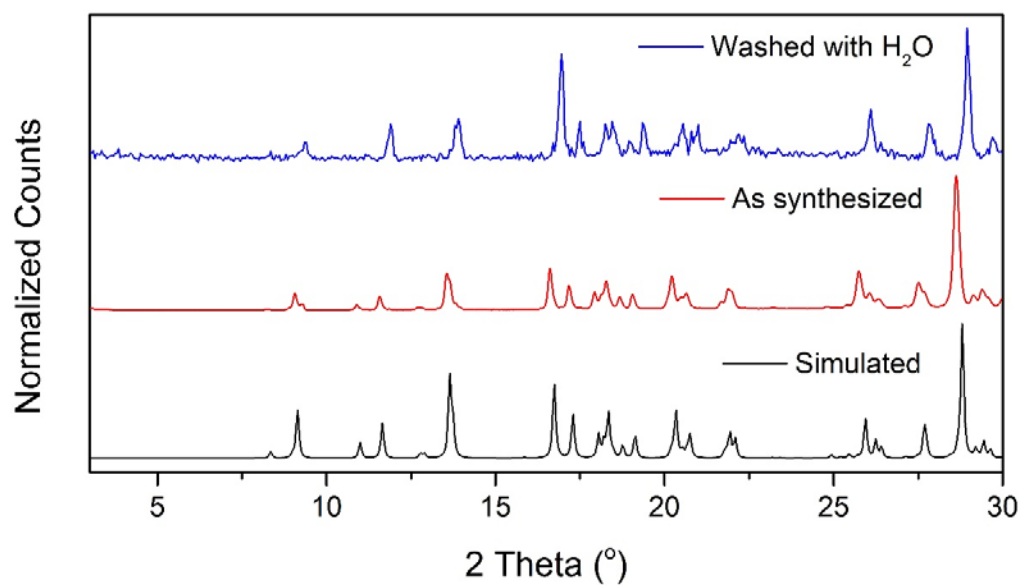

**Figure S3.** The PXRD patterns of  $[\text{Fe}_2(\text{H}_2\text{L})(\text{H}_2\text{O})_5]$ .

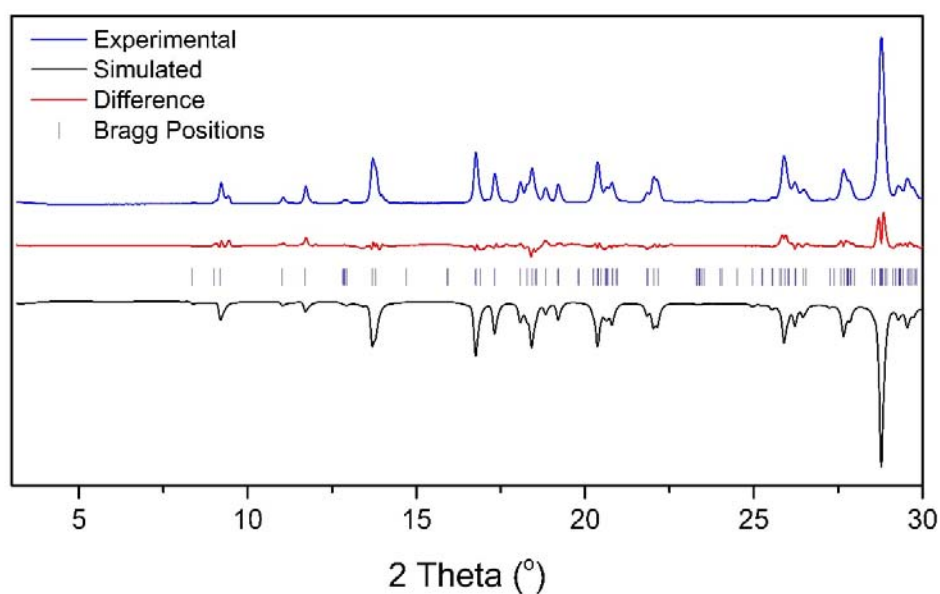

**Figure S4.** Le Bail refinement plot showing the experimental, simulated (reverted) and difference powder diffraction patterns of  $[\text{Fe}_2(\text{H}_2\text{L})(\text{H}_2\text{O})_5]$ . Vertical markers refer to the calculated positions of the Bragg reflections.  $R_p = 4.281$ ,  $R_{wp} = 7.104$ , Weighting scheme:  $w=1.0/\text{ycount}$ , Profile function: Pearson VII.

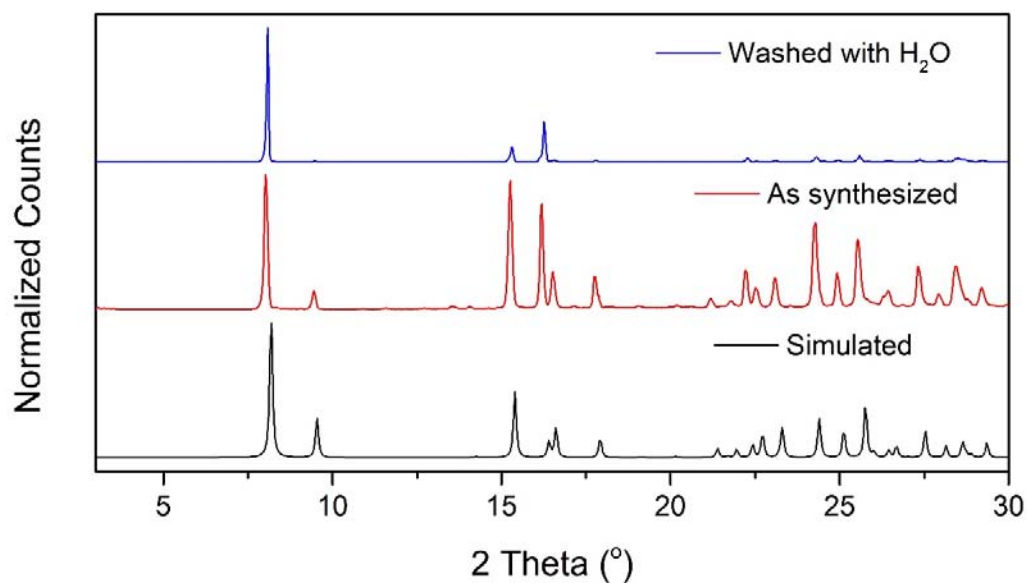

**Figure S5.** The PXRD patterns of  $[\text{Fe}(\text{H}_4\text{L})(\text{H}_2\text{O})_2] \cdot 2\text{H}_2\text{O}$ .

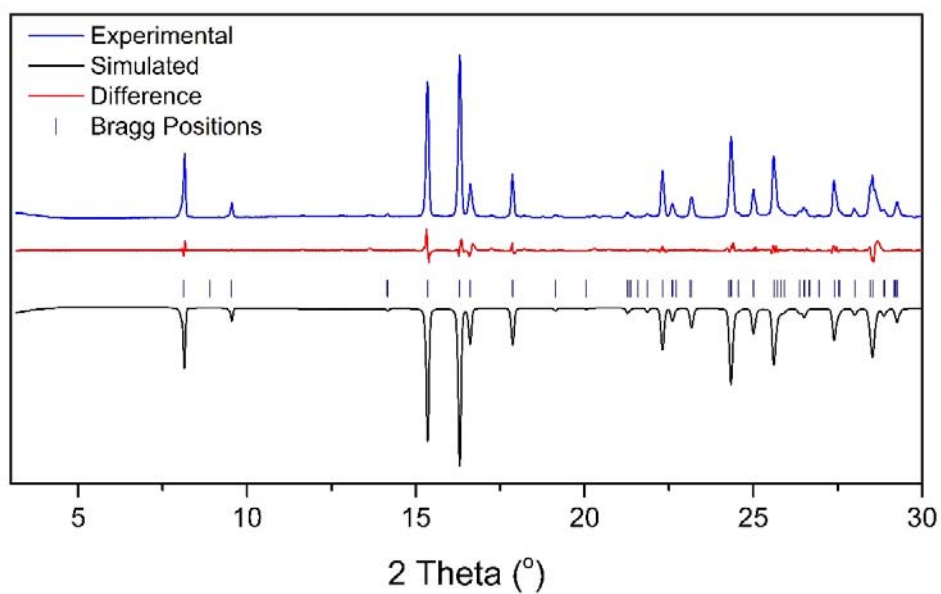

**Figure S6.** Le Bail refinement plot showing the experimental, simulated (reverted) and difference powder diffraction patterns of  $[\text{Fe}(\text{H}_4\text{L})(\text{H}_2\text{O})_2] \cdot 2\text{H}_2\text{O}$ . Vertical markers refer to the calculated positions of the Bragg reflections.  $R_p = 6.038$ ,  $R_{wp} = 7.153$ , Weighting scheme:  $w = 1.0/y_{\text{count}}^2$ , Profile function: Pseudo-Voigt.

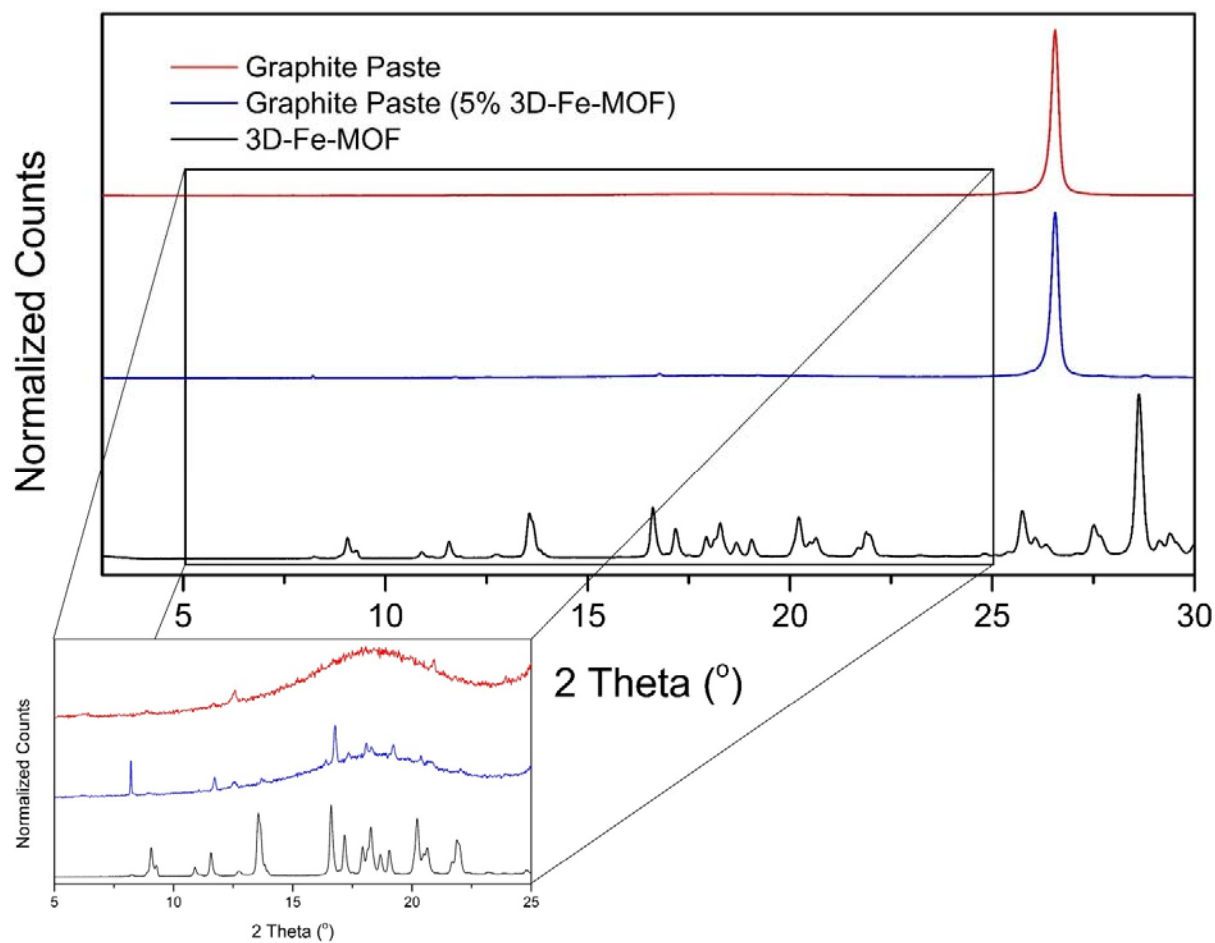

**Figure S7.** The PXRD patterns of the graphite paste (red line), of the  $[\text{Fe}_2(\text{H}_2\text{L})(\text{H}_2\text{O})_5]$  (black line) and of the graphite paste with 5% of  $[\text{Fe}_2(\text{H}_2\text{L})(\text{H}_2\text{O})_5]$  (blue line). Besides the low percentage of the MOF and the preferred orientation of the pattern, characteristic peaks of the MOF are visible in the pxrd of the enriched graphite paste.

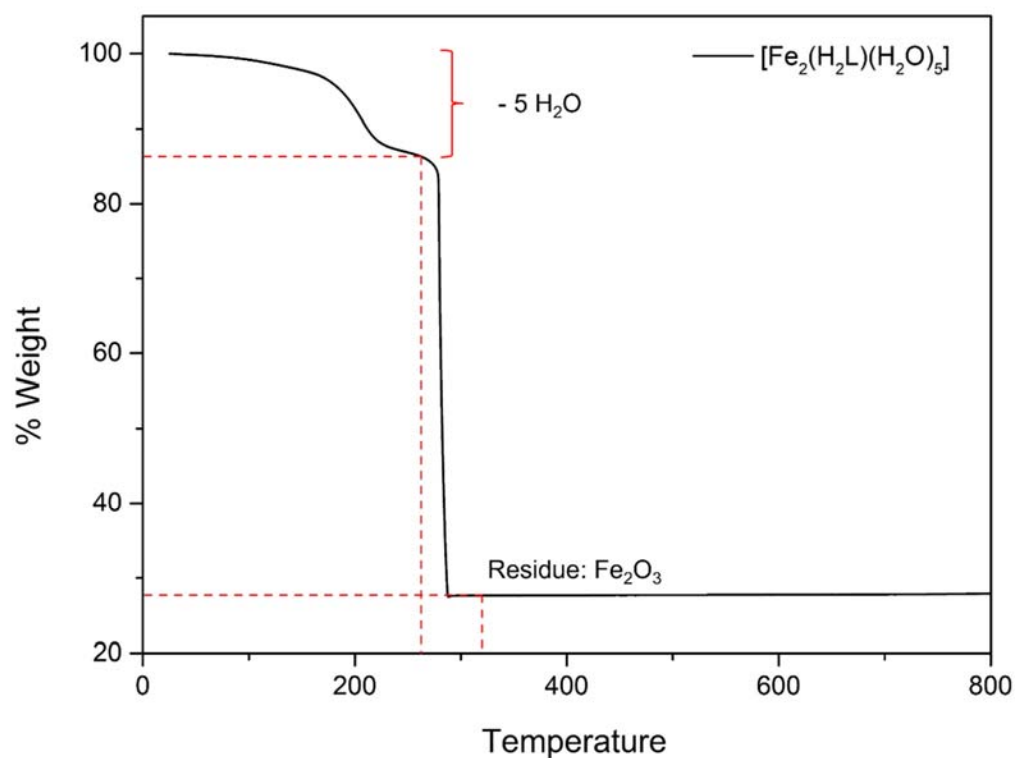

**Figure S8.** Thermogravimetric analysis reveals that  $[\text{Fe}_2(\text{H}_2\text{L})(\text{H}_2\text{O})_5]$  losses  $\sim 13.69\%$  within 25 - 260 °C temperature range which is very close to the theoretical value of the five coordinated  $\text{H}_2\text{O}$  molecules (theoretical value 14.65%). The residue above 360 °C is  $\sim 27.65\%$  which corresponds to  $\text{Fe}_2\text{O}_3$  (theoretical value 26.05%).



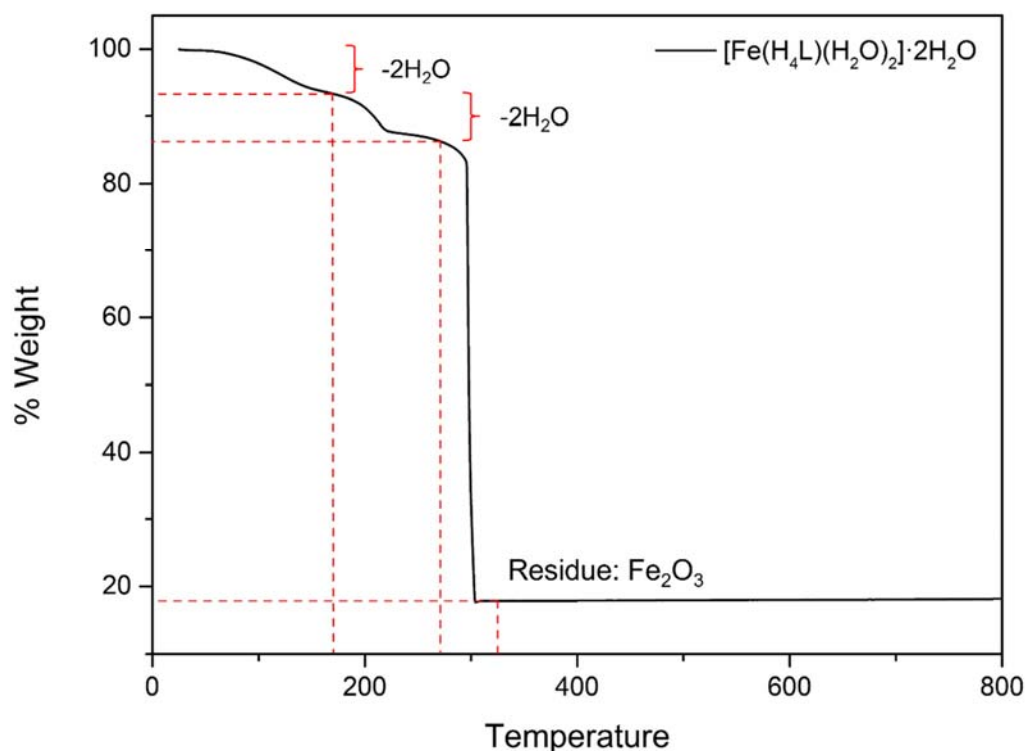

**Figure S9.** The Thermographic analysis of  $[\text{Fe}(\text{H}_4\text{L})(\text{H}_2\text{O})_2]\cdot 2\text{H}_2\text{O}$ . Thermogravimetric analysis reveals that  $[\text{Fe}(\text{H}_4\text{L})(\text{H}_2\text{O})_2]\cdot 2\text{H}_2\text{O}$  losses  $\sim 6.45\%$  within  $25 - 170\text{ }^\circ\text{C}$  temperature range which is very close to the theoretical value of the two  $\text{H}_2\text{O}$  molecules in the lattice (theoretical value  $6.64\%$ ) followed by a loss of  $\sim 6.96\%$  within the  $170 - 260\text{ }^\circ\text{C}$  that can be attributed to the loss of the two coordinated  $\text{H}_2\text{O}$  molecules (theoretical value  $6.64\%$ ). The residue above  $360\text{ }^\circ\text{C}$  is  $\sim 17.83\%$  which corresponds to  $\text{Fe}_2\text{O}_3$  (theoretical value  $20.06\%$ ).

## Sorption studies

### *Chemicals and Reagents*

All standards and reagents used, were of high-purity grade ( $>95\%$ ). Glucose and Glucose- $^{13}\text{C}$  (internal standard-IS) were purchased from Sigma-Aldrich (Stenheim, Germany). Acetonitrile (ACN) (LC-MS grade) and hydrochloric acid were acquired from Merck (Darmstadt, Germany), while ammonia hydroxide solution ( $25\%$ ) ( $\text{NH}_4\text{OH}$ ) was obtained from Carlo Ebra (Val-de-Reuil, France). Distilled water was provided by a Milli-Q purification apparatus (Millipore Direct-Q UV, Bedford, MA, USA). Regenerated cellulose syringe filters (RC filters, pore size  $0.2\text{ }\mu\text{m}$ , diameter  $15\text{ mm}$ ) were obtained from Macherey-Nagel (Düren, Germany). Standard stock solution of glucose and its corresponding internal standard were prepared in ultrapure water at a concentration of  $1000\text{ mg L}^{-1}$  and stored at  $-20\text{ }^\circ\text{C}$  in amber-colored glass vials. A working solution of

glucose at a concentration of 100 mg L<sup>-1</sup> was prepared by dilution of the stock solution in ultrapure water. Subsequent dilutions of the working solution were made, for the construction of calibration curve and matrix matched samples.

#### *Instrumental analysis*

A hydrophilic interaction chromatography (HILIC) method coupled with mass spectrometer triple quadrupole (MS) was performed for the determination of glucose in the samples. Glucose was determined immediately after the completion of sorption experiment. A Thermo TSQ Quantum Access triple quadrupole system (San Jose, CA, USA), equipped with an Electrospray Ionisation Source (ESI), an UHPLC pump (Thermo Accela) and an Accela autosampler was used for the analysis. An Acquity BEH amide chromatographic column (2.1 mm X 100 mm, 1.7  $\mu$ m, Waters Corporation, Milford, MA) was utilized for analytes' determination. The mobile phases were comprised of a mixture of ACN:H<sub>2</sub>O:NH<sub>4</sub>OH 89.9:10:0.1% (v:v:v) and (B) ACN:H<sub>2</sub>O: NH<sub>4</sub>OH 30:69.9:0.1 (v:v:v). The elution program was isocratic, with a flow rate of 300  $\mu$ L min<sup>-1</sup> and the column's temperature was set at 35 °C. The injection volume was set to 10  $\mu$ L, and each chromatographic run was completed in 8 min. The instrument was operated in negative ionization mode. For data processing, Thermo Fisher Scientific's Xcalibur software, Version 2.3 (Waltham, MA, USA) was employed.

Standard solutions in acetonitrile:H<sub>2</sub>O 80:20 (v:v) at a concentration of 10 mg L<sup>-1</sup> for glucose, as well as glucose-<sup>13</sup>C were prepared. After the direct infusion of these solutions in the ESI, the precursor ion of the analytes and their corresponding product ions, the collision energy (CE), and the tube lens (TL) settings were obtained. Following that, the optimum ESI parameters were ion spray voltage, 3000 V; sheath gas, 30 a.u.; auxiliary gas, 0 a.u.; capillary temperature, 300 °C.

The selected reaction monitoring approach (SRM) was used, and two transitions were selected for obtaining the quantifier and qualifier ion of glucose. Specifically, the quantifier ion (defined as the most abundant ion), and the qualifier ion (defined as the second most intense ion) were picked. Regarding the glucose-<sup>13</sup>C (IS), the most abundant ion was taken into consideration. The abovementioned parameters are tabulated in the Table S2.

**Table S2.** Selected reaction monitoring (SRM) transitions of glucose and glucose-<sup>13</sup>C

| Analyte                        |                   | Precursor ion (m/z) | Product ions (m/z) * | Collision energy (eV) | Tube lens | Retention time (min) |
|--------------------------------|-------------------|---------------------|----------------------|-----------------------|-----------|----------------------|
| Glucose                        |                   | 179                 | 59                   | 19                    | 63        | 4.8                  |
|                                |                   |                     | 161                  | 6                     |           |                      |
|                                | Internal standard |                     |                      |                       |           |                      |
| Glucose - <sup>13</sup> C (IS) |                   | 180                 | 162                  | 5                     | 86        | 4.8                  |

\* Where in bold is highlighted the quantification ion

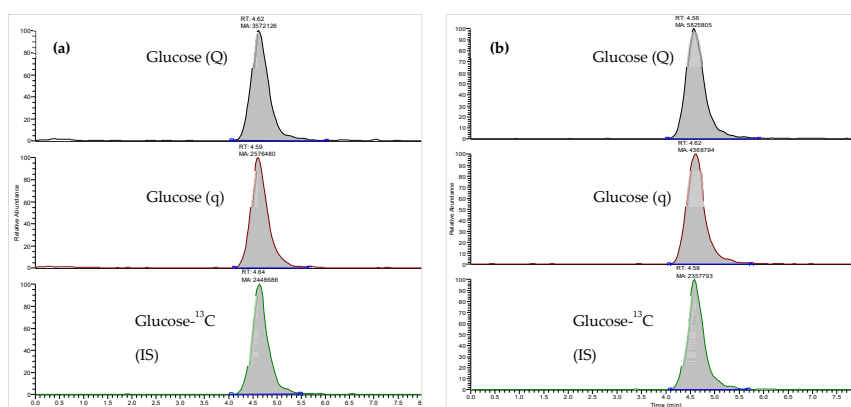

**Figure S10.** Representative chromatogram of (a) glucose solution (20 mg L<sup>-1</sup>) used for the absorption (b) the supernatant solution of glucose, using as absorbent the **3D-Fe-MOF** (where glucose (Q) is the quantifier ion of glucose, glucose (q) is the qualifier ion of glucose, and glucose-<sup>13</sup>C (IS) is the most abundant ion for the internal standard (IS)).

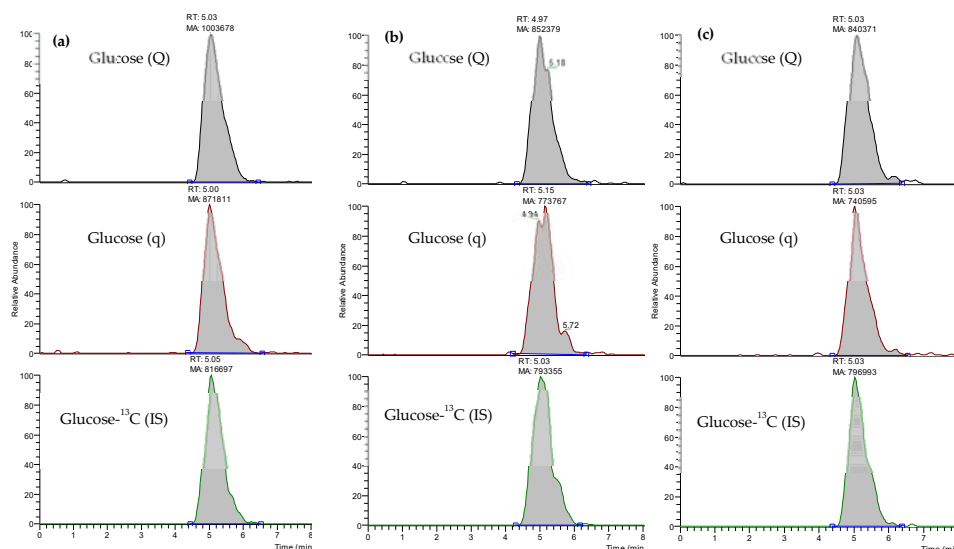

**Figure S11.** Representative chromatogram of (a) glucose standard solution ( $20 \text{ mg L}^{-1}$ ) (b) glucose solution used for the absorption ( $20 \text{ mg L}^{-1}$ ) (c) the supernatant solution of artificial sweat using as absorbent the **3D-Fe-MOF** (where glucose (Q) is the quantifier ion of glucose, glucose (q) is the qualifier ion of glucose, and glucose- $^{13}\text{C}$  (IS) is the most abundant ion for the internal standard glucose- $^{13}\text{C}$  (IS)).

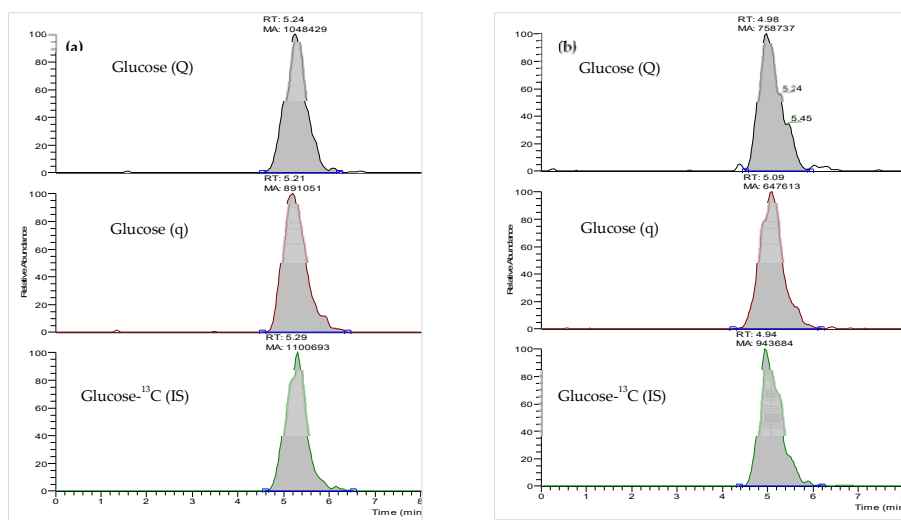

**Figure S12.** Representative chromatogram of (a) standard glucose solution ( $20 \text{ mg L}^{-1}$ ) (b) supernatant solution of artificial sweat using as absorbent the **2D-Fe-MOF** (where glucose (Q) is the quantifier ion of glucose, glucose (q) is the qualifier ion of glucose, and glucose- $^{13}\text{C}$  (IS) is the most abundant ion for the internal standard glucose- $^{13}\text{C}$ ).

**Table S3.** Bond Valence Sums (BVS) for the iron atoms in the two structures. ( $R_o$  and B values for each calculation.  $Fe^{II}$  :  $R_o = 1.734$ ,  $B = 0.37$ ,  $Fe^{III}$  :  $R_o = 1.759$ ,  $B = 0.37$ ).

| 3D-Fe-MOF                         |              |                                   |              | 2D-Fe-MOF                         |              |
|-----------------------------------|--------------|-----------------------------------|--------------|-----------------------------------|--------------|
| Fe1-O Distances (Å)               |              | Fe2-O Distances (Å)               |              | Fe1-O Distances (Å)               |              |
| Fe1-O8                            | 2.079        | Fe2-O7                            | 2.177        | Fe1-O1                            | 2.055        |
| Fe1-O6                            | 2.159        | Fe2-O5                            | 2.152        | Fe1-O1                            | 2.055        |
| Fe1-O3                            | 2.060        | Fe2-O11                           | 2.107        | Fe1-O2                            | 2.164        |
| Fe1-O2                            | 2.131        | Fe2-O12                           | 2.137        | Fe1-O2                            | 2.164        |
| Fe1-O14                           | 2.153        | Fe2-O1                            | 2.125        | Fe1-O6                            | 2.179        |
| Fe1-O15                           | 2.219        | Fe2-O13                           | 2.080        | Fe1-O6                            | 2.179        |
| <b>BVS (<math>Fe^{II}</math>)</b> | <b>2.059</b> | <b>BVS (<math>Fe^{II}</math>)</b> | <b>2.067</b> | <b>BVS (<math>Fe^{II}</math>)</b> | <b>2.066</b> |
| BVS ( $Fe^{III}$ )                | 2.203        | BVS ( $Fe^{III}$ )                | 2.211        | BVS ( $Fe^{III}$ )                | 2.211        |

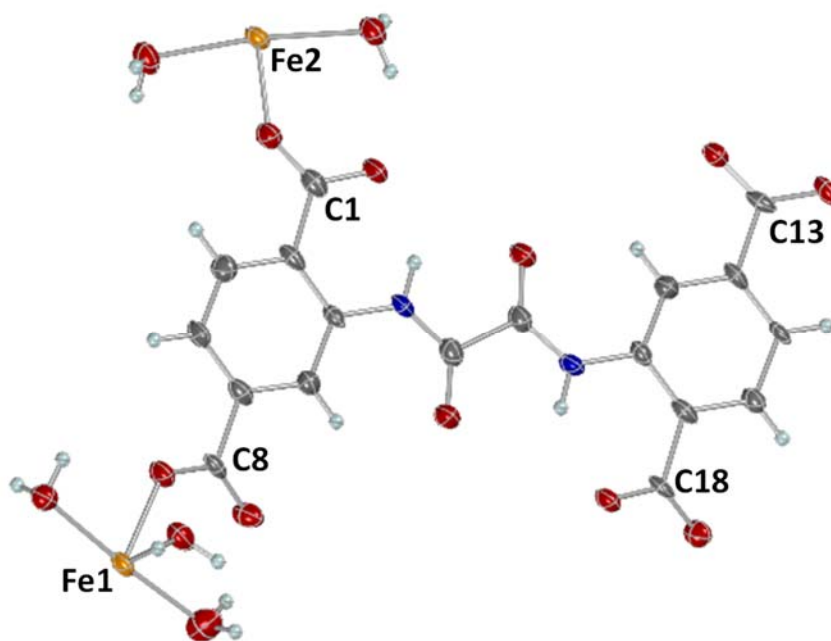

**Figure S13.** The asymmetric unit of the 3D-Fe-MOF. Color code: Fe orange, C, grey, H cyan, O red, N blue.

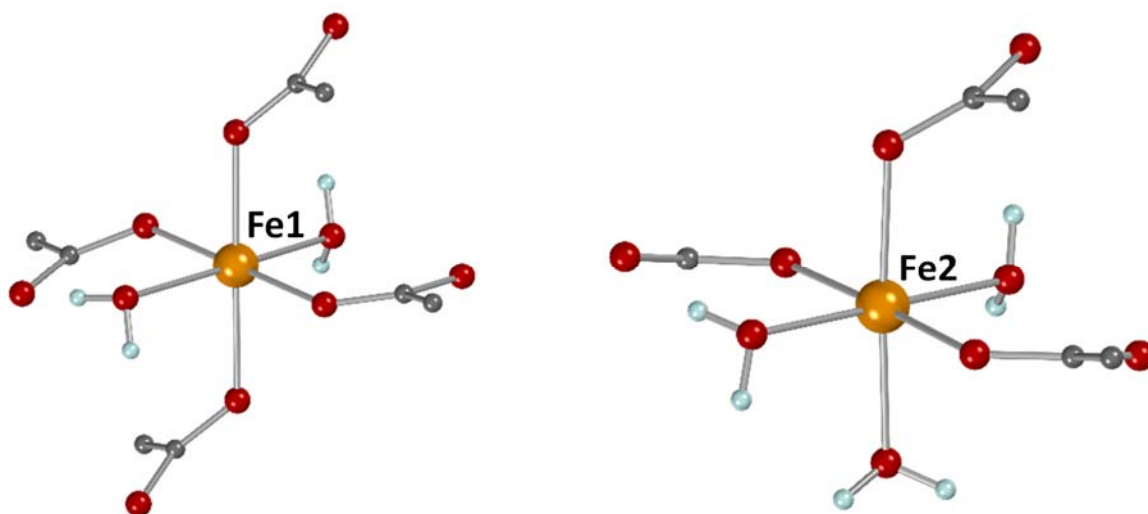

**Figure S14.** The coordination environment around Fe1 (left) and Fe2 (right) in the crystal structure of the 3D-Fe-MOF. Color code: same as in Figure S10.

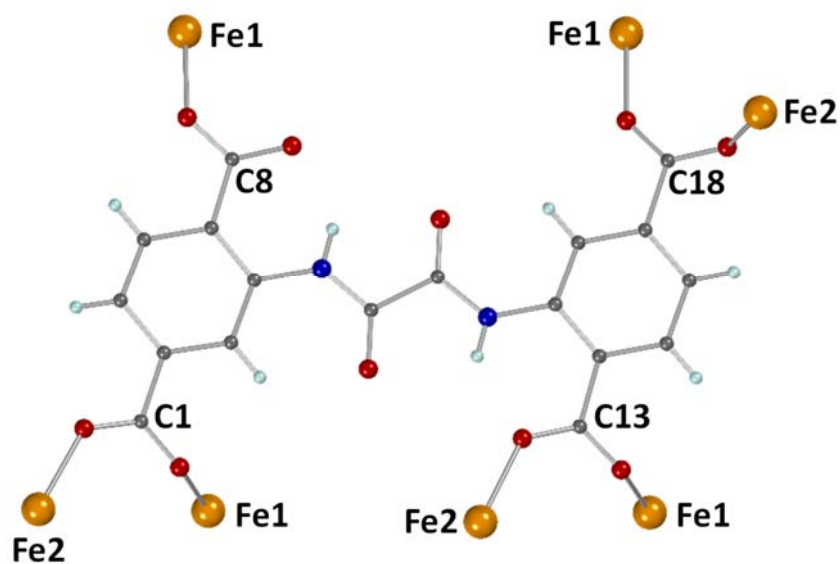

**Figure S15.** The coordination mode of the tetra-anion of the ligand ( $H_2L^{4-}$ ) in the crystal structure of the 3D-Fe-MOF. Color code: same as in Figure S10.

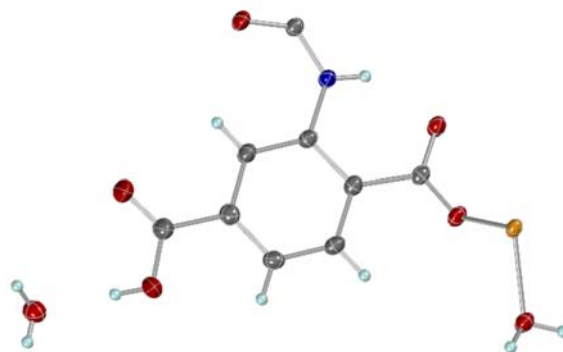

**Figure S16.** The asymmetric unit of the **2D-Fe-MOF**. Color code: Fe orange, C, grey, H cyan, O red, N blue.

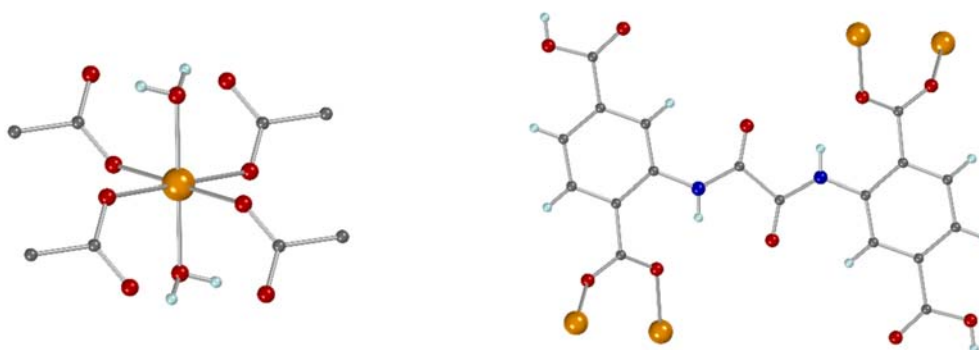

**Figure S17.** The coordination environment around Fe (left) and the coordination mode of the di-anion of the ligand ( $\text{H}_4\text{L}^{2-}$ ) (right) in the crystal structure of the **2D-Fe-MOF**. Color code: same as in Figure S13.

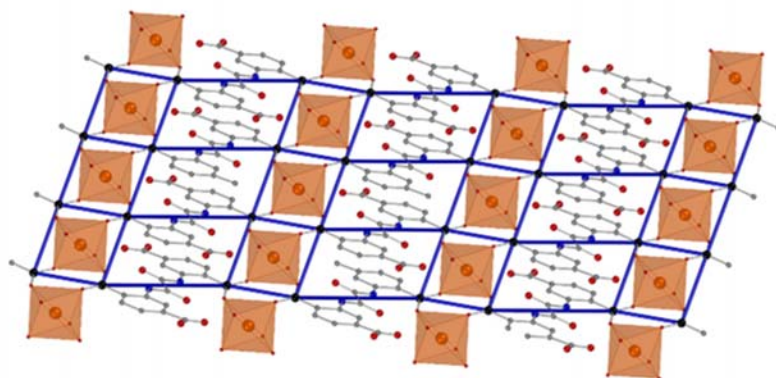

**Figure S18.** The underline **sql** network of the **2D-Fe-MOF**. Color code: same as in Figure S13.

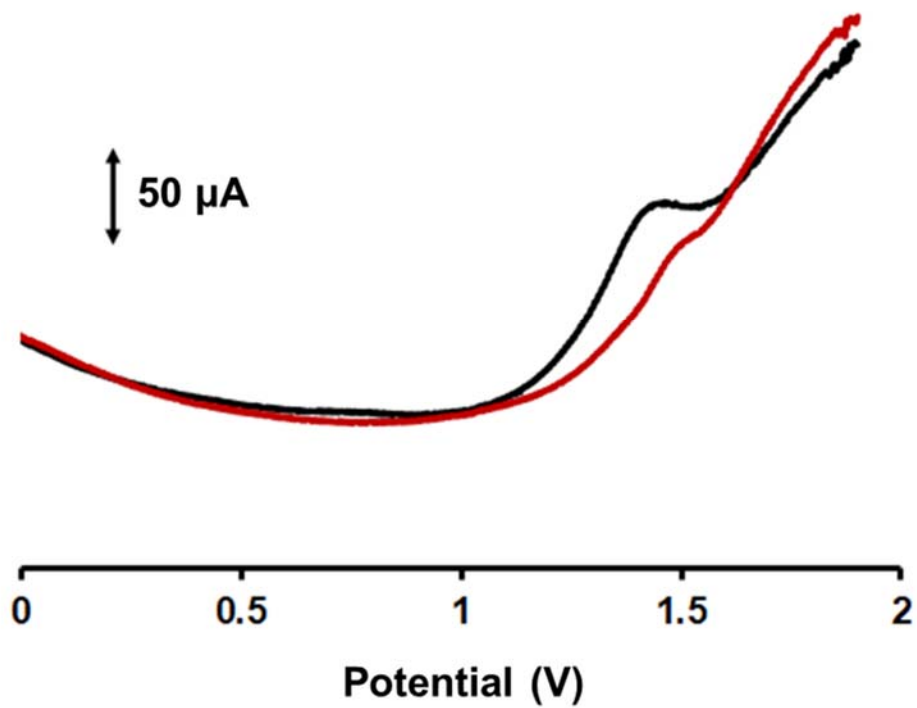

**Figure S19.** DP voltammograms of 0 and 600  $\mu\text{M}$  GLU at the GPE modified with the **3D-Fe-MOF** in artificial sweat (pH 4.0).
